# Supplementary material for: Identification and validation of a glycolysis-associated multiomics prognostic model for hepatocellular carcinoma
Source: publisher site journal article supplement (doi:10.18632/aging.202613), 2021-03-03
Supplement: Supplementary file [file aging-v13i5-202613-supplementary-material-SD2.pdf]

## SUPPLEMENTARY TABLE

**Supplementary Table 1. Glycolysis-associated genes from KEGG signaling pathways.**

|            |         |         |         |         |         |         |        |        |         |          |         |
|------------|---------|---------|---------|---------|---------|---------|--------|--------|---------|----------|---------|
| AAAS       | ALDH3B2 | CACNA1H | DDIT4   | GAL3ST1 | GUSB    | LDHAL6A | NUP133 | PCK1   | PKP2    | RBCK1    | TGFBI   |
| ABCB6      | ALDH7A1 | CAPN5   | DEPDC1  | GALE    | GYS1    | LDHAL6B | NUP153 | PCK2   | PLOD1   | RPE      | TKTL1   |
| AC010618.1 | ALDH9A1 | CASP6   | DLAT    | GALK1   | GYS2    | LDHB    | NUP155 | PDHA1  | PLOD2   | RRAGD    | TPBG    |
| AC074143.1 | ALDOA   | CD4     | DLD     | GALK2   | HAX1    | LDHC    | NUP160 | PDHA2  | PMM2    | SAP30    | TPH1    |
| ACSS1      | ALDOB   | CD44    | DPYSL4  | GALM    | HDLBP   | LHPP    | NUP188 | PDHB   | POLR3K  | SDC1     | TPR     |
| ADH1A      | ALDOC   | CDK1    | DSC2    | GAPDH   | HK1     | LHX9    | NUP205 | PDK3   | POM121  | SDC2     | TPST1   |
| ADH1B      | ALG1    | CENPA   | ECD     | GAPDHS  | HK2     | MDH1    | NUP210 | PFKFB1 | POM121C | SDC3     | TSTA3   |
| ADH1C      | ANG     | CHPF    | EFNA3   | GCK     | HK3     | MDH2    | NUP214 | PFKFB2 | PFIA4   | SDHC     | TXN     |
| ADH4       | ANGPTL4 | CHPF2   | EGFR    | GCKR    | HMMR    | ME1     | NUP35  | PFKFB3 | PPIA    | SEC13    | UGP2    |
| ADH5       | ANKZF1  | CHST1   | EGLN3   | GCLC    | HOMER1  | ME2     | NUP37  | PFKFB4 | PPP2CA  | SEH1L    | VCAN    |
| ADH6       | ARPP19  | CHST12  | ELF3    | GFPT1   | HS2ST1  | MED24   | NUP43  | PFKL   | PPP2CB  | SLC16A3  | VEGFA   |
| ADH7       | ARTN    | CHST2   | ENO1    | GLCE    | HS6ST2  | MERTK   | NUP50  | PFKM   | PPP2R1A | SLC25A10 | VLDLR   |
| ADORA2B    | AURKA   | CHST4   | ENO2    | GLRX    | HSPA5   | MET     | NUP54  | PFKP   | PPP2R1B | SLC25A13 | XYLT2   |
| ADPGK      | B3GALT6 | CHST6   | ENO3    | GMPPA   | IDH1    | MIF     | NUP58  | PGAM1  | PPP2R5D | SLC35A3  | ZNF292  |
| AGL        | B3GAT1  | CITED2  | ERO1A   | GMPPB   | IDUA    | MIOX    | NUP62  | PGAM2  | PRKACA  | SLC37A4  | ALDH3B1 |
| AGRN       | B3GAT3  | CLDN3   | EXT1    | GNE     | IER3    | MPI     | NUP85  | PGAM4  | PRKACB  | SOD1     | BPNT1   |
| AK3        | B3GNT3  | CLDN9   | EXT2    | GNPDA1  | IGFBP3  | MXI1    | NUP88  | PGK1   | PRKACG  | SOX9     | DCN     |
| AK4        | B4GALT1 | CLN6    | FAM162A | GNPDA2  | IL13RA1 | NANP    | NUP93  | PGK2   | PRPS1   | SPAG4    | G6PD    |
| AKR1A1     | B4GALT2 | COG2    | FBP1    | GOT1    | IRS2    | NASP    | NUP98  | PGM1   | PSMC4   | SRD5A3   | GPR87   |
| ALDH1A3    | B4GALT4 | COL5A1  | FBP2    | GOT2    | ISG20   | NDC1    | NUPL2  | PGM2   | PYGB    | STC1     | LDHA    |
| ALDH1B1    | B4GALT7 | COPB2   | FKBP4   | GPC1    | KDELRL3 | NDST3   | P4HA1  | PGM2L1 | PYGL    | STC2     | NUP107  |
| ALDH2      | BID     | CTH     | FUT8    | GPC3    | KIF20A  | NDUFV3  | P4HA2  | PGP    | QSOX1   | STMN1    | PC      |
| ALDH3A1    | BIK     | CXCR4   | G6PC    | GPC4    | KIF2A   | NSDHL   | PAM    | PHKA2  | RAE1    | TALDO1   | PKM     |
| ALDH3A2    | BPGM    | CYB5A   | G6PC2   | GPI     | LCT     | NT5E    | PAXIP1 | PKLR   | RANBP2  | TFF3     | TGFA    |
